# Supplementary material
Source: PubMed Central journal article supplement (PMC6990709)
Supplement: jamasurg-155-194-s001.pdf [file jamasurg-155-194-s001.pdf]

## Supplementary Online Content

Courcoulas A, Coley RY, Clark JM, et al. Interventions and operations 5 years after bariatric surgery in a cohort from the US National Patient-Centered Clinical Research Network Bariatric Study. *JAMA Surg*. Published online January 15, 2020. doi:10.1001/jamasurg.2019.5470

**eFigure.** Flow Diagram for Identification of the Cohort

**eTable 1.** Kaplan-Meier Estimated Cumulative Incidence of Operations, Interventions, and Endoscopy

**eTable 2.** Causes of Death

**eAppendix.** Results for Adjustable Gastric Band (AGB)

This supplementary material has been provided by the authors to give readers additional information about their work.

**eFigure. Flow Diagram for Identification of the Cohort**

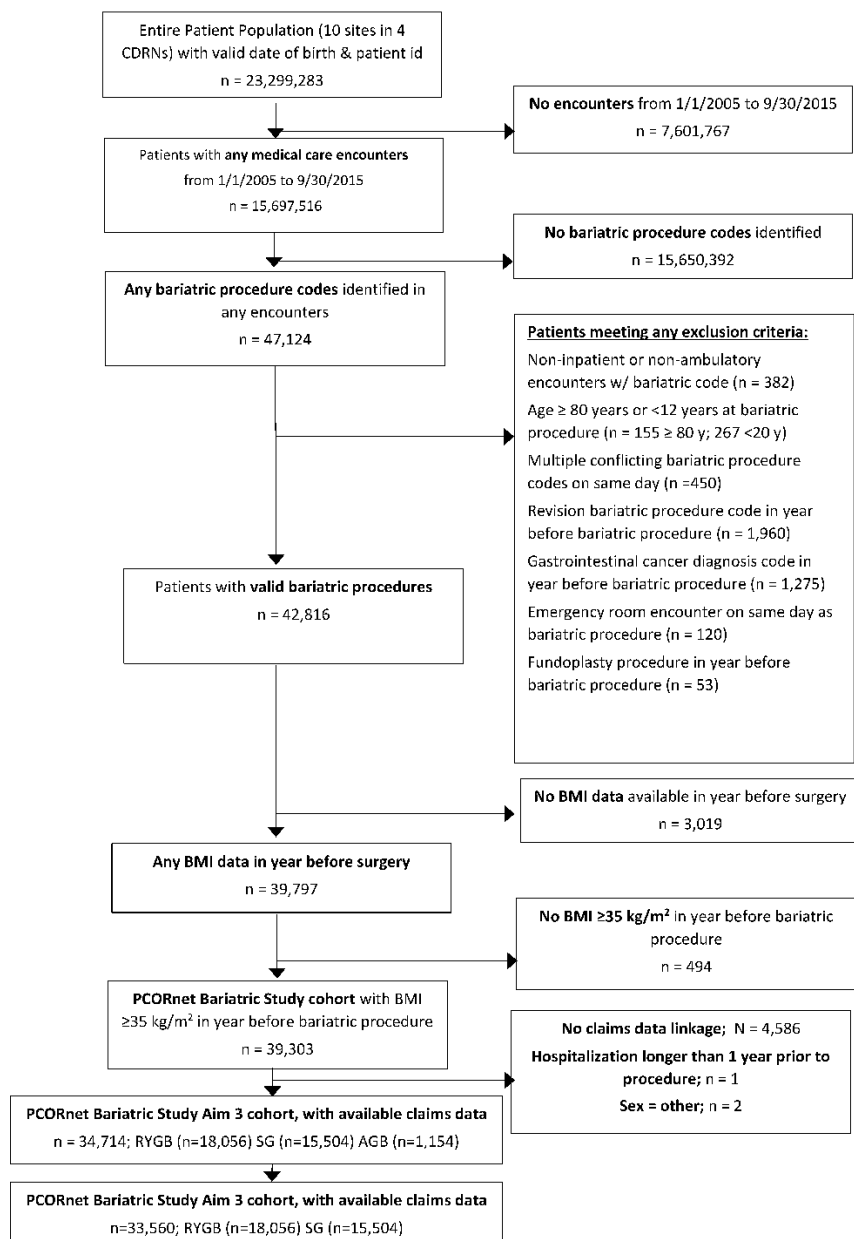

**eTable 1. Kaplan-Meier Estimated Cumulative Incidence of Operations, Interventions, and Endoscopy<sup>a</sup>**

|                                    | RYGB (n=18,056)    |                      |                      | SG (n=15,504)     |                   |                   |
|------------------------------------|--------------------|----------------------|----------------------|-------------------|-------------------|-------------------|
|                                    | 1 year %           | 3 year %             | 5 year %             | 1 year %          | 3 year %          | 5 year %          |
| <b>OPERATIONS <sup>b</sup></b>     | 4.5<br>(4.2, 4.8)  | 10<br>(9.5, 10.5)    | 13.6<br>(12.9, 14.3) | 2.3<br>(2, 2.5)   | 5.2<br>(4.8, 5.6) | 8.3<br>(7.5, 9.2) |
| REVISION <sup>c</sup>              | 1.3<br>(1.2, 1.5)  | 2<br>(1.8, 2.2)      | 2.8<br>(2.5, 3.2)    | 1<br>(0.8, 1.1)   | 2.1<br>(1.8, 2.3) | 4<br>(3.3, 4.7)   |
| ABDOMINAL WALL HERNIA <sup>d</sup> | 1.4<br>(1.2, 1.6)  | 5.1<br>(4.7, 5.4)    | 7<br>(6.5, 7.5)      | 0.7<br>(0.6, 0.9) | 2.1<br>(1.8, 2.4) | 3.2<br>(2.7, 3.7) |
| OTHER OPERATIONS <sup>e</sup>      | 2.8<br>(2.6, 3.1)  | 5.5<br>(5.1, 5.9)    | 7.9<br>(7.4, 8.5)    | 0.9<br>(0.8, 1.1) | 2.1<br>(1.8, 2.3) | 3.1<br>(2.6, 3.7) |
| <b>INTERVENTIONS <sup>f</sup></b>  |                    |                      |                      |                   |                   |                   |
| ENTERAL ACCESS <sup>g</sup>        | 0.6<br>(0.5, 0.7)  | 1.1<br>(0.9, 1.2)    | 1.3<br>(1.1, 1.5)    | 0.1<br>(0, 0.1)   | 0.2<br>(0.1, 0.2) | 0.3<br>(0.1, 0.4) |
| OTHER INTERVENTIONS <sup>h</sup>   | 0.2<br>(0.1, 0.2)  | 0.3<br>(0.2, 0.4)    | 0.4<br>(0.3, 0.6)    | 0.2<br>(0.1, 0.3) | 0.4<br>(0.3, 0.5) | 0.5<br>(0.3, 0.7) |
| <b>ENDOSCOPY <sup>i</sup></b>      | 9.7<br>(9.3, 10.2) | 15.7<br>(15.1, 16.3) | 20.6<br>(19.8, 21.3) | 2.7<br>(2.4, 3)   | 4.8<br>(4.4, 5.2) | 6.8<br>(6, 7.5)   |

**a – From Kaplan Meier plots**

b - Category includes any operative procedure on the abdomen (includes subcategories of revision, abdominal wall hernia repairs, , and other reoperation-includes internal hernia, paraesophageal/hiatal hernia); **Biliary procedures including cholecystectomy were excluded;**

c - Category includes only subsequent bariatric procedures (e.g. conversion from SG to RYGB) as well as revisional procedures such as gastrectomy;

d- Category includes only repair of ventral hernias and other abdominal wall hernias - does not include internal hernias or paraesophageal/hiatal hernias;

e - Category includes those abdominal operative procedures not captured under the prior categories and represents presumed complications, includes internal hernias or paraesophageal/hiatal hernias;

f – Category includes any enteral access, non-operative procedures on the abdomen;

g – Category includes placement of gastrostomy tubes or other feeding devices, either percutaneously or through other means of access;

h– Category includes invasive but not operative procedures on the abdomen such as paracentesis, or radiologically-guided drainage procedures that do not involve incision

i – Category includes any endoscopic procedure for diagnosis or treatment on the upper GI tract

**eTable 2. Causes of Death**

| All (n=33,560; 464 deaths) |                          |              | RYGB (n=18,056; 364 deaths) |                          |              | SG (n=15,504; 100 deaths) |                          |              |
|----------------------------|--------------------------|--------------|-----------------------------|--------------------------|--------------|---------------------------|--------------------------|--------------|
| Rank                       | Cause of Death           | Total Number | Rank                        | Cause of Death           | Total Number | Rank                      | Cause of Death           | Total Number |
| 1                          | None                     | 144          | 1                           | None                     | 106          | 1                         | None                     | 38           |
| 2                          | Cardiac                  | 63           | 2                           | Malignancy               | 51           | 2                         | Cardiac                  | 21           |
| 3                          | Malignancy               | 66           | 3                           | Cardiac                  | 42           | 3                         | Endocrine                | 20           |
| 4                          | Endocrine                | 53           | 4                           | Coronary artery disease  | 38           | 4                         | Malignancy               | 15           |
| 5                          | Coronary artery disease  | 49           | 5                           | Diabetes                 | 34           | 5                         | Respiratory              | 13           |
| 6                          | Diabetes                 | 42           | 6                           | Endocrine                | 33           | 6                         | Coronary artery disease  | 11           |
| 7                          | Sepsis                   | 33           | 7                           | Sepsis                   | 27           | 7                         | Alcohol/substance        | 9            |
| 8                          | Alcohol/Substance        | 31           | 8                           | Accidental injury        | 23           | 8                         | Renal                    | 9            |
| 9                          | Hypertension             | 31           | 9                           | Hypertension             | 23           | 9                         | Diabetes                 | 8            |
| 10                         | Respiratory              | 29           | 10                          | Alcohol/substance        | 22           | 10                        | GI                       | 8            |
| 11                         | Renal                    | 30           | 11                          | Trauma                   | 21           | 11                        | Hypertension             | 8            |
| 12                         | Accidental injury        | 29           | 12                          | Renal                    | 21           | 12                        | Congestive heart failure | 7            |
| 13                         | GI                       | 24           | 13                          | GI                       | 16           | 13                        | Sepsis                   | 6            |
| 14                         | Trauma                   | 24           | 14                          | Respiratory              | 16           | 14                        | Accidental injury        | 6            |
| 15                         | Congestive heart failure | 21           | 15                          | Self harm                | 15           | 15                        | Pulmonary embolism       | 5            |
| 16                         | Self harm                | 18           | 16                          | Liver                    | 15           | 16                        | Other                    | 4            |
| 17                         | Liver                    | 17           | 17                          | Congestive heart failure | 14           | 17                        | Self harm                | 3            |

|    |                           |    |  |    |            |    |  |    |               |   |
|----|---------------------------|----|--|----|------------|----|--|----|---------------|---|
| 18 | Neurologic                | 15 |  | 18 | Neurologic | 12 |  | 18 | Trauma        | 3 |
| 19 | Other                     | 12 |  | 19 | Other      | 8  |  | 19 | Flu/pneumonia | 3 |
| 20 | Stroke/Intracranial bleed | 8  |  | 20 | Vascular   | 8  |  | 20 | Vascular      | 3 |

**eAppendix. Results for Adjustable Gastric Band (AGB)**

eAppendix Figure 1: Cumulative Incidence Operation or Intervention, Endoscopy, Hospitalization, and Revision\*

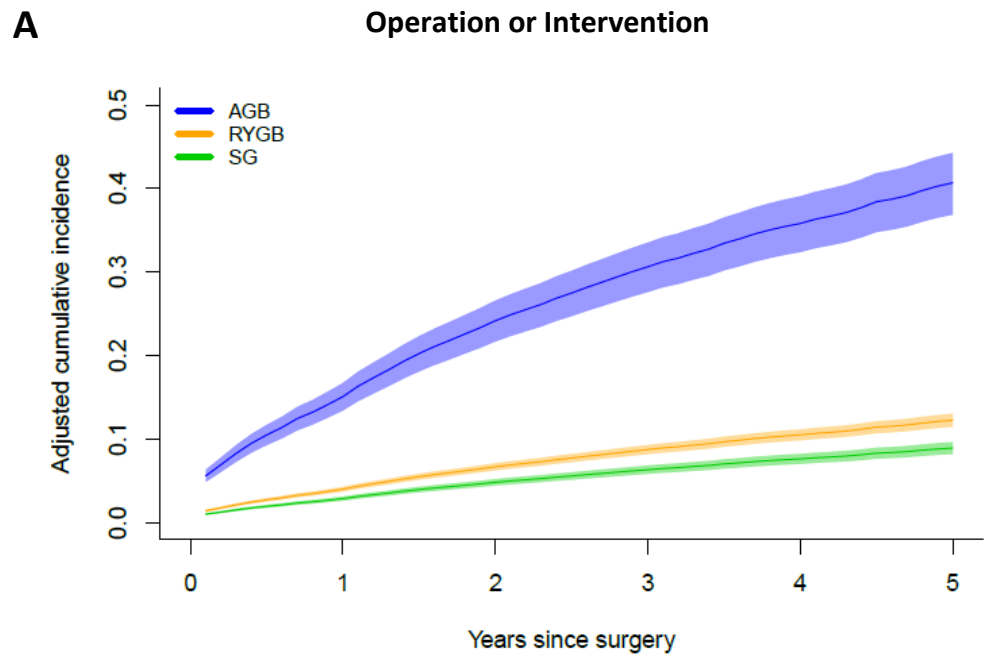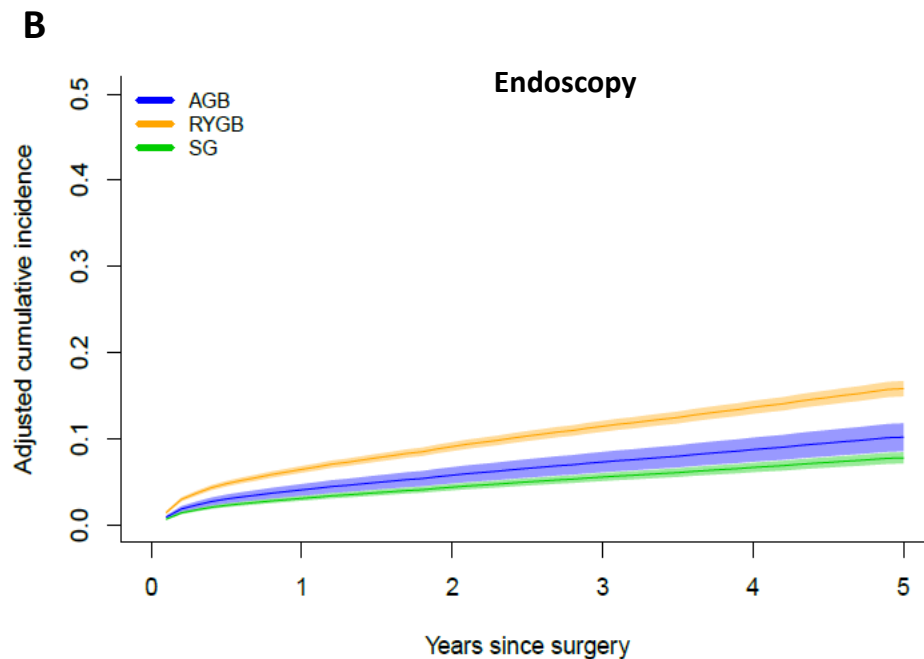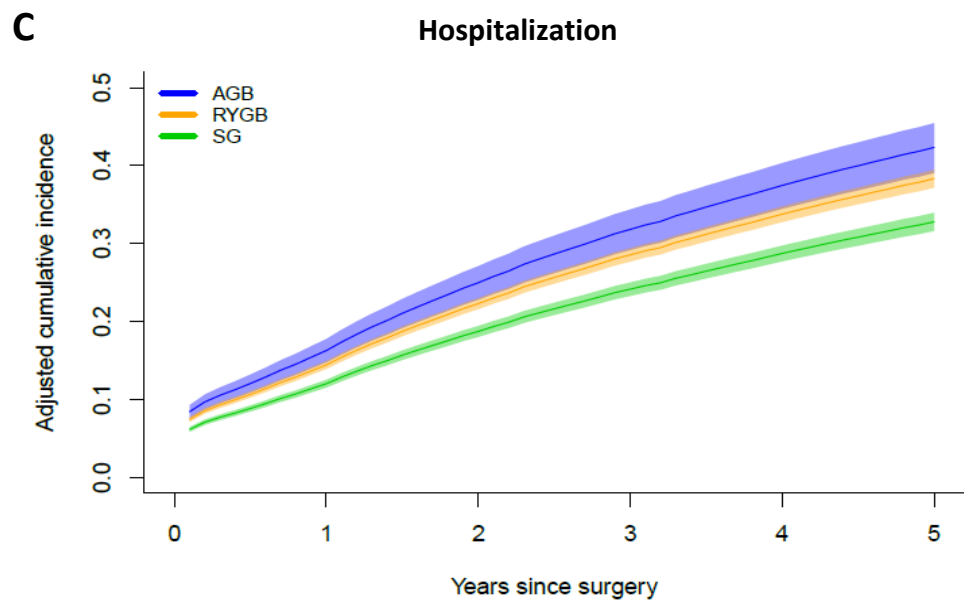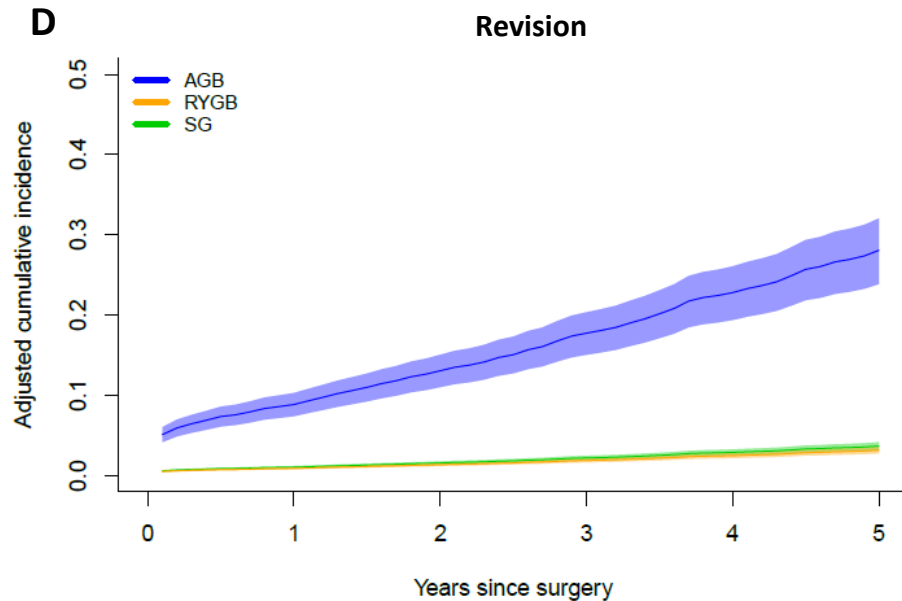

© 2020 American Medical Association. All rights reserved.

\*Adjusted cumulative incidence based on cox proportional hazards model results—solid colored lines—with 95% pointwise confidence intervals—shading around lines



**eAppendix Table 1. Baseline Characteristics**

|                                   | RYGB (n=18,056) |        |       | SG (n=15,504) |        |       | AGB (n=1,154) |        |       | All (n=34,714) |        |       |
|-----------------------------------|-----------------|--------|-------|---------------|--------|-------|---------------|--------|-------|----------------|--------|-------|
|                                   | Mean            | Median | SD    | Mean          | Median | SD    | Mean          | Median | SD    | Mean           | Median | SD    |
| <b>Age</b>                        | 45.8            | 46     | 11.44 | 44.1          | 44     | 11.47 | 46.3          | 46     | 12.15 | 45.1           | 45     | 11.51 |
| <b>Sex – N (%)</b>                |                 |        |       |               |        |       |               |        |       |                |        |       |
| Female                            | 14481 (80.2)    |        |       | 12493 (80.6)  |        |       | 912 (79)      |        |       | 27886 (80.3)   |        |       |
| Male                              | 3575 (19.8)     |        |       | 3011 (19.4)   |        |       | 242 (21)      |        |       | 6828 (19.7)    |        |       |
| <b>Race – N (%)</b>               |                 |        |       |               |        |       |               |        |       |                |        |       |
| Asian                             | 186 (1.03)      |        |       | 227 (1.5)     |        |       | 9 (0.8)       |        |       | 422 (1.2)      |        |       |
| Black                             | 2246 (12.4)     |        |       | 3574 (23.1)   |        |       | 217 (18.8)    |        |       | 6037 (17.4)    |        |       |
| Missing                           | 1950 (10.8)     |        |       | 2675 (17.3)   |        |       | 91 (7.9)      |        |       | 4716 (13.6)    |        |       |
| Multiple                          | 10 (0.1)        |        |       | 10 (0.1)      |        |       | 1 (0.1)       |        |       | 21 (0.1)       |        |       |
| Native                            | 161 (0.9)       |        |       | 129 (0.8)     |        |       | 9 (0.8)       |        |       | 299 (0.9)      |        |       |
| Other                             | 154 (0.9)       |        |       | 73 (0.5)      |        |       | 12 (1)        |        |       | 239 (0.7)      |        |       |
| Pacific Islander                  | 72 (0.4)        |        |       | 80 (0.5)      |        |       | 0 (0)         |        |       | 152 (0.4)      |        |       |
| White                             | 13277 (73.5)    |        |       | 8736 (56.4)   |        |       | 815 (70.6)    |        |       | 22828 (65.8)   |        |       |
| <b>Hispanic Ethnicity – N (%)</b> |                 |        |       |               |        |       |               |        |       |                |        |       |

|                               | RYGB (n=18,056) |        |       | SG (n=15,504) |        |       | AGB (n=1,154) |        |       | All (n=34,714) |        |       |
|-------------------------------|-----------------|--------|-------|---------------|--------|-------|---------------|--------|-------|----------------|--------|-------|
| Missing                       | 1970 (10.9)     |        |       | 1124 (7.3)    |        |       | 250 (21.7)    |        |       | 3344 (9.6)     |        |       |
| No                            | 12432 (68.9)    |        |       | 9399 (60.6)   |        |       | 762 (66)      |        |       | 22593 (65.1)   |        |       |
| Yes                           | 3654 (20.2)     |        |       | 4981 (32.1)   |        |       | 142 (12.3)    |        |       | 8777 (25.3)    |        |       |
|                               | Mean            | Median | SD    | Mean          | Median | SD    | Mean          | Median | SD    | Mean           | Median | SD    |
| <b>BMI</b>                    | 49.7            | 48.1   | 8.09  | 48.5          | 46.8   | 7.65  | 46.4          | 45     | 6.40  | 49             | 47.4   | 7.88  |
| <b>Weight</b>                 | 127.9           | 123.6  | 25.58 | 123.6         | 118.9  | 24.53 | 121.5         | 118.4  | 21.71 | 125.7          | 121.4  | 25.10 |
| <b>Procedure Year – N (%)</b> |                 |        |       |               |        |       |               |        |       |                |        |       |
| 2005-2009                     | 4038 (22.4)     |        |       | 412 (2.7)     |        |       | 333 (28.9)    |        |       | 4783 (13.8)    |        |       |
| 2010                          | 2840 (15.7)     |        |       | 1085 (7)      |        |       | 266 (23.1)    |        |       | 4191 (12.1)    |        |       |
| 2011                          | 3300 (18.3)     |        |       | 2886 (18.6)   |        |       | 317 (27.5)    |        |       | 6503 (18.7)    |        |       |
| 2012                          | 2573 (14.3)     |        |       | 2978 (19.2)   |        |       | 119 (10.3)    |        |       | 5670 (16.3)    |        |       |
| 2013                          | 1824 (10.1)     |        |       | 2651 (17.1)   |        |       | 60 (5.2)      |        |       | 4535 (13.1)    |        |       |
| 2014                          | 1907 (10.6)     |        |       | 2921 (18.8)   |        |       | 46 (4)        |        |       | 4874 (14)      |        |       |
| 2015                          | 1574 (8.7)      |        |       | 2571 (16.6)   |        |       | 13 (1.1)      |        |       | 4158 (12)      |        |       |
| <b>Comorbidities – N (%)</b>  |                 |        |       |               |        |       |               |        |       |                |        |       |
| Anxiety                       | 3891 (21.6)     |        |       | 3248 (21)     |        |       | 238 (20.6)    |        |       | 7377 (21.3)    |        |       |

|                    | <b>RYGB (n=18,056)</b> | <b>SG (n=15,504)</b> | <b>AGB (n=1,154)</b> | <b>All (n=34,714)</b> |
|--------------------|------------------------|----------------------|----------------------|-----------------------|
| Depression         | 6361 (35.2)            | 4288 (27.7)          | 343 (29.7)           | 10992 (31.7)          |
| Diabetes           | 8018 (44.4)            | 4094 (26.4)          | 347 (30.1)           | 12459 (35.9)          |
| DVT <sup>a</sup>   | 122 (0.7)              | 56 (0.4)             | 11 (1)               | 189 (0.5)             |
| Dyslipidemia       | 9782 (54.2)            | 6991 (45.1)          | 562 (48.7)           | 17335 (49.9)          |
| Eating disorder    | 3421 (19)              | 450 (2.9)            | 123 (10.7)           | 3994 (11.5)           |
| GERD <sup>b</sup>  | 7925 (43.9)            | 4463 (28.8)          | 453 (39.3)           | 12841 (37)            |
| Hypertension       | 11220 (62.1)           | 7897 (50.9)          | 666 (57.7)           | 19783 (57)            |
| Kidney disease     | 1976 (10.9)            | 1168 (7.5)           | 77 (6.7)             | 3221 (9.3)            |
| NAFLD <sup>c</sup> | 4534 (25.1)            | 1688 (10.9)          | 198 (17.2)           | 6420 (18.5)           |
| Osteoarthritis     | 438 (2.4)              | 325 (2.1)            | 22 (1.9)             | 785 (2.3)             |
| PE <sup>d</sup>    | 258 (1.4)              | 108 (0.7)            | 17 (1.5)             | 383 (1.1)             |
| Sleep apnea        | 10017 (55.5)           | 6067 (39.1)          | 583 (50.5)           | 16667 (48)            |

<sup>a</sup>DVT – Deep vein thrombosis; <sup>b</sup>Gastroesophageal reflux disease; <sup>c</sup>Non-alcoholic fatty liver disease; <sup>d</sup>Pulmonary embolism

**eAppendix Table 2. Adjusted Hazard Ratio (HR) and Event Probability**

| <b>Hazard Ratio (95% CI) for comparison of different events across procedures</b> |              |          |          |          |         |
|-----------------------------------------------------------------------------------|--------------|----------|----------|----------|---------|
| Outcome                                                                           | Procedures   | Estimate | Lower CI | Upper CI | P-value |
| Operation or Intervention ( <b>Oorl</b> )<br><i>excluding endoscopy</i>           | SG vs. RYGB  | 0.715    | 0.646    | 0.793    | <0.001  |
|                                                                                   | AGB vs. RYGB | 3.989    | 3.553    | 4.479    | <0.001  |
|                                                                                   | AGB vs. SG   | 5.576    | 4.849    | 6.412    | <0.001  |
| Endoscopy                                                                         | SG vs. RYGB  | 0.471    | 0.426    | 0.52     | <0.001  |
|                                                                                   | AGB vs. RYGB | 0.624    | 0.531    | 0.734    | <0.001  |
|                                                                                   | AGB vs. SG   | 1.325    | 1.103    | 1.592    | <0.01   |
| Revision                                                                          | SG vs. RYGB  | 1.165    | 0.976    | 1.392    | 0.09    |
|                                                                                   | AGB vs. RYGB | 10.271   | 8.625    | 12.231   | <0.001  |
|                                                                                   | AGB vs. SG   | 8.814    | 7.159    | 10.851   | <0.001  |
| Hospitalization                                                                   | SG vs. RYGB  | 0.822    | 0.781    | 0.866    | <0.001  |
|                                                                                   | AGB vs. RYGB | 1.139    | 1.032    | 1.258    | <0.01   |
|                                                                                   | AGB vs. SG   | 1.385    | 1.245    | 1.542    | <0.001  |
| Mortality                                                                         | SG vs. RYGB  | 0.942    | 0.725    | 1.225    | 0.66    |

|                                                                                               |              |                     |                     |                     |      |
|-----------------------------------------------------------------------------------------------|--------------|---------------------|---------------------|---------------------|------|
|                                                                                               | AGB vs. RYGB | 1.218               | 0.804               | 1.846               | 0.35 |
|                                                                                               | AGB vs. SG   | 1.292               | 0.814               | 2.053               | 0.28 |
| <b>Estimated % of patients with outcome event at specified timepoints [Estimate (95% CI)]</b> |              |                     |                     |                     |      |
| Outcome                                                                                       | Procedure    | 1 year              | 3 year              | 5 year              |      |
| Operation or Intervention (Oral)<br><i>excluding</i> endoscopy                                | RYGB         | 4.02 (3.74 4.3)     | 8.76 (8.22 9.3)     | 12.27 (11.49 13.05) |      |
|                                                                                               | SG           | 2.89 (2.65 3.14)    | 6.35 (5.85 6.85)    | 8.94 (8.23 9.65)    |      |
|                                                                                               | AGB          | 15.1 (13.44 16.73)  | 30.64 (27.62 33.53) | 40.68 (36.88 44.26) |      |
| Endoscopy                                                                                     | RYGB         | 6.46 (6.08 6.84)    | 11.46 (10.83 12.08) | 15.83 (14.94 16.71) |      |
|                                                                                               | SG           | 3.1 (2.84 3.36)     | 5.57 (5.12 6.02)    | 7.8 (7.15 8.43)     |      |
|                                                                                               | AGB          | 4.08 (3.41 4.75)    | 7.31 (6.14 8.47)    | 10.2 (8.57 11.79)   |      |
| Revision                                                                                      | RYGB         | 0.9 (0.78 1.02)     | 1.88 (1.65 2.12)    | 3.16 (2.75 3.56)    |      |
|                                                                                               | SG           | 1.05 (0.9 1.19)     | 2.19 (1.91 2.47)    | 3.67 (3.18 4.16)    |      |
|                                                                                               | AGB          | 8.86 (7.4 10.29)    | 17.75 (15.05 20.36) | 28.07 (23.87 32.04) |      |
| Hospitalization                                                                               | RYGB         | 14.44 (13.94 14.95) | 28.55 (27.69 29.4)  | 38.33 (37.17 39.46) |      |
|                                                                                               | SG           | 12.04 (11.55 12.53) | 24.15 (23.29 25.0)  | 32.79 (31.62 33.94) |      |
|                                                                                               | AGB          | 16.28 (14.78 17.76) | 31.82 (29.18 34.36) | 42.34 (39.06 45.44) |      |

|           |      |                  |                  |                  |
|-----------|------|------------------|------------------|------------------|
| Mortality | RYGB | 0.17 (0.13 0.21) | 0.45 (0.36 0.54) | 0.89 (0.71 1.06) |
|           | SG   | 0.16 (0.12 0.2)  | 0.43 (0.33 0.52) | 0.84 (0.65 1.02) |
|           | AGB  | 0.21 (0.11 0.3)  | 0.55 (0.31 0.79) | 1.08 (0.62 1.54) |

**eAppendix Table 3. Heterogeneity of Treatment Effects**

| <b>Age:</b>                                                                                  |           |             |              |              |             |              |              |                 |              |              |
|----------------------------------------------------------------------------------------------|-----------|-------------|--------------|--------------|-------------|--------------|--------------|-----------------|--------------|--------------|
| Evidence of heterogeneous treatment effect of procedures on event time given age at baseline |           |             |              |              |             |              |              |                 |              |              |
|                                                                                              |           | Age < 65    |              |              | Age >65     |              |              |                 |              |              |
|                                                                                              |           | Adjusted HR | Lower 95% CI | Upper 95% CI | Adjusted HR | Lower 95% CI | Upper 95% CI | p-value for HTE |              |              |
| SG vs. RYGB                                                                                  |           | 0.711       | 0.64         | 0.79         | 0.783       | 0.562        | 1.089        | 0.58            |              |              |
| AGB vs RYGB                                                                                  |           | 4.148       | 3.681        | 4.675        | 2.677       | 1.826        | 3.925        | 0.03            |              |              |
| AGB vs SG                                                                                    |           | 5.833       | 5.052        | 6.734        | 3.42        | 2.194        | 5.33         | 0.02            |              |              |
| Estimated percent of patients with event at 1, 3, and 5 years                                |           |             |              |              |             |              |              |                 |              |              |
|                                                                                              |           | 1 year      |              |              | 3 years     |              |              | 5 years         |              |              |
|                                                                                              |           | Estimate    | Lower 95% CI | Upper 95% CI | Estimate    | Lower 95% CI | Upper 95% CI | Estimate        | Lower 95% CI | Upper 95% CI |
| RYGB                                                                                         | Age < 65  | 3.95        | 3.67         | 4.23         | 8.61        | 8.06         | 9.15         | 12.06           | 11.28        | 12.84        |
|                                                                                              | Age >= 65 | 5.61        | 4.59         | 6.62         | 12.1        | 9.99         | 14.16        | 16.82           | 13.94        | 19.61        |
| SG                                                                                           | Age < 65  | 2.83        | 2.58         | 3.07         | 6.2         | 5.7          | 6.7          | 8.74            | 8.01         | 9.45         |
|                                                                                              | Age >= 65 | 4.42        | 3.18         | 5.64         | 9.61        | 6.98         | 12.15        | 13.42           | 9.81         | 16.9         |
| AGB                                                                                          | Age < 65  | 15.39       | 13.66        | 17.09        | 31.17       | 28.04        | 34.16        | 41.32           | 37.39        | 45.01        |
|                                                                                              | Age >= 65 | 14.32       | 9.54         | 18.85        | 29.2        | 20.09        | 37.28        | 38.92           | 27.36        | 48.64        |

| <b>Gender:</b>                                                                               |        |             |              |              |             |              |              |                 |              |              |                 |
|----------------------------------------------------------------------------------------------|--------|-------------|--------------|--------------|-------------|--------------|--------------|-----------------|--------------|--------------|-----------------|
| Evidence of heterogeneous treatment effect of procedures on event time given gender          |        |             |              |              |             |              |              |                 |              |              |                 |
|                                                                                              |        | Female      |              |              | Male        |              |              |                 |              |              |                 |
|                                                                                              |        | Adjusted HR | Lower 95% CI | Upper 95% CI | Adjusted HR | Lower 95% CI | Upper 95% CI | p-value for HTE |              |              |                 |
| SG vs. RYGB                                                                                  |        | 0.699       | 0.625        | 0.782        | 0.784       | 0.642        | 0.959        | 0.30            |              |              |                 |
| AGB vs RYGB                                                                                  |        | 4.18        | 3.686        | 4.741        | 3.27        | 2.53         | 4.225        | 0.08            |              |              |                 |
| AGB vs SG                                                                                    |        | 5.981       | 5.14         | 6.959        | 4.168       | 3.119        | 5.571        | 0.02            |              |              |                 |
| Estimated percent of patients with event at 1, 3, and 5 years                                |        |             |              |              |             |              |              |                 |              |              |                 |
|                                                                                              |        | 1 year      |              |              | 3 years     |              |              | 5 years         |              |              |                 |
|                                                                                              |        | Estimate    | Lower 95% CI | Upper 95% CI | Estimate    | Lower 95% CI | Upper 95% CI | Estimate        | Lower 95% CI | Upper 95% CI |                 |
| RYGB                                                                                         | Female | 4.04        | 3.75         | 4.34         | 8.81        | 8.23         | 9.39         | 12.34           | 11.52        | 13.17        |                 |
|                                                                                              | Male   | 3.93        | 3.46         | 4.4          | 8.58        | 7.6          | 9.54         | 12.02           | 10.66        | 13.36        |                 |
| SG                                                                                           | Female | 2.84        | 2.58         | 3.11         | 6.25        | 5.7          | 6.79         | 8.8             | 8.02         | 9.57         |                 |
|                                                                                              | Male   | 3.1         | 2.57         | 3.62         | 6.79        | 5.68         | 7.89         | 9.56            | 8            | 11.09        |                 |
| AGB                                                                                          | Female | 15.85       | 13.99        | 17.67        | 32.01       | 28.65        | 35.2         | 42.35           | 38.16        | 46.26        |                 |
|                                                                                              | Male   | 12.29       | 9.48         | 15.02        | 25.41       | 19.98        | 30.48        | 34.21           | 27.22        | 40.52        |                 |
| <b>BMI:</b>                                                                                  |        |             |              |              |             |              |              |                 |              |              |                 |
| Evidence of heterogeneous treatment effect of procedures on event time given BMI at baseline |        |             |              |              |             |              |              |                 |              |              |                 |
|                                                                                              |        | BMI < 50    |              |              | BMI 50-60   |              |              | BMI >= 60       |              |              |                 |
|                                                                                              |        | Adjusted HR | Lower 95% CI | Upper 95% CI | Adjusted HR | Lower 95% CI | Upper 95% CI | Adjusted HR     | Lower 95% CI | Upper 95% CI | p-value for HTE |
| SG vs. RYGB                                                                                  |        | 0.708       | 0.632        | 0.795        | 0.746       | 0.61         | 0.913        | 0.775           | 0.543        | 1.105        | <0.01           |
| AGB vs RYGB                                                                                  |        | 4.205       | 3.71         | 4.767        | 3.106       | 2.354        | 4.097        | 3.814           | 2.001        | 7.269        | <0.001          |
| AGB vs SG                                                                                    |        | 5.935       | 5.103        | 6.903        | 4.161       | 3.03         | 5.714        | 4.923           | 2.45         | 9.893        | <0.001          |



| Estimated percent of patients with event at 1, 3, and 5 years |           |          |              |              |          |              |              |          |              |              |
|---------------------------------------------------------------|-----------|----------|--------------|--------------|----------|--------------|--------------|----------|--------------|--------------|
|                                                               |           | 1 year   |              |              | 3 years  |              |              | 5 years  |              |              |
|                                                               |           | Estimate | Lower 95% CI | Upper 95% CI | Estimate | Lower 95% CI | Upper 95% CI | Estimate | Lower 95% CI | Upper 95% CI |
| RYGB                                                          | BMI < 50  | 3.9      | 3.6          | 4.19         | 8.5      | 7.92         | 9.08         | 11.91    | 11.08        | 12.74        |
|                                                               | BMI 50-60 | 4.29     | 3.83         | 4.74         | 9.32     | 8.4          | 10.24        | 13.04    | 11.74        | 14.32        |
|                                                               | BMI >= 60 | 4.78     | 3.95         | 5.6          | 10.36    | 8.63         | 12.05        | 14.45    | 12.06        | 16.76        |
| SG                                                            | BMI < 50  | 2.78     | 2.51         | 3.04         | 6.1      | 5.56         | 6.65         | 8.59     | 7.82         | 9.37         |
|                                                               | BMI 50-60 | 3.22     | 2.66         | 3.77         | 7.05     | 5.86         | 8.22         | 9.9      | 8.24         | 11.53        |
|                                                               | BMI >= 60 | 3.72     | 2.57         | 4.86         | 8.12     | 5.66         | 10.52        | 11.39    | 7.97         | 14.67        |
| AGB                                                           | BMI < 50  | 15.4     | 13.63        | 17.14        | 31.18    | 27.97        | 34.25        | 41.34    | 37.31        | 45.1         |
|                                                               | BMI 50-60 | 11.61    | 3.56         | 18.99        | 24.1     | 7.79         | 37.53        | 32.53    | 10.9         | 48.92        |
|                                                               | BMI >= 60 | 18.6     | 14.88        | 22.15        | 36.85    | 30.27        | 42.81        | 48.11    | 40.16        | 55.01        |

| <b>Diabetes:</b>                                                                      |             |             |              |              |             |              |              |                 |              |              |
|---------------------------------------------------------------------------------------|-------------|-------------|--------------|--------------|-------------|--------------|--------------|-----------------|--------------|--------------|
| Evidence of heterogeneous treatment effect of procedures on event time given diabetes |             |             |              |              |             |              |              |                 |              |              |
|                                                                                       |             | No diabetes |              |              | Diabetes    |              |              |                 |              |              |
|                                                                                       |             | Adjusted HR | Lower 95% CI | Upper 95% CI | Adjusted HR | Lower 95% CI | Upper 95% CI | p-value for HTE |              |              |
| SG vs. RYGB                                                                           |             | 0.678       | 0.6          | 0.765        | 0.796       | 0.68         | 0.931        | 0.09            |              |              |
| AGB vs RYGB                                                                           |             | 3.981       | 3.47         | 4.567        | 3.958       | 3.277        | 4.78         | 0.96            |              |              |
| AGB vs SG                                                                             |             | 5.875       | 4.999        | 6.903        | 4.976       | 3.97         | 6.236        | 0.21            |              |              |
| Estimated percent of patients with event at 1, 3, and 5 years                         |             |             |              |              |             |              |              |                 |              |              |
|                                                                                       |             | 1 year      |              |              | 3 years     |              |              | 5 years         |              |              |
|                                                                                       |             | Estimate    | Lower 95% CI | Upper 95% CI | Estimate    | Lower 95% CI | Upper 95% CI | Estimate        | Lower 95% CI | Upper 95% CI |
| RYGB                                                                                  | No diabetes | 4.11        | 3.78         | 4.45         | 8.96        | 8.29         | 9.62         | 12.54           | 11.59        | 13.47        |
|                                                                                       | Diabetes    | 3.9         | 3.55         | 4.25         | 8.51        | 7.8          | 9.21         | 11.92           | 10.92        | 12.91        |
| SG                                                                                    | No diabetes | 2.81        | 2.53         | 3.08         | 6.16        | 5.58         | 6.74         | 8.68            | 7.86         | 9.49         |

|     |             |       |       |       |       |       |       |       |       |       |
|-----|-------------|-------|-------|-------|-------|-------|-------|-------|-------|-------|
|     | Diabetes    | 3.12  | 2.68  | 3.55  | 6.83  | 5.9   | 7.75  | 9.61  | 8.31  | 10.89 |
| AGB | No diabetes | 15.4  | 13.48 | 17.27 | 31.17 | 27.69 | 34.49 | 41.34 | 36.97 | 45.4  |
|     | Diabetes    | 14.58 | 12.03 | 17.05 | 29.67 | 24.94 | 34.11 | 39.5  | 33.54 | 44.93 |

**Comorbidity index:**

Evidence of heterogeneous treatment effect of procedures on event time given comorbidity score

|             | Comorbidity < 0 |              |              | Comorbidity = 0 |              |              | Comorbidity > 0 |              |              | p-value for HTE |
|-------------|-----------------|--------------|--------------|-----------------|--------------|--------------|-----------------|--------------|--------------|-----------------|
|             | Adjusted HR     | Lower 95% CI | Upper 95% CI | Adjusted HR     | Lower 95% CI | Upper 95% CI | Adjusted HR     | Lower 95% CI | Upper 95% CI |                 |
| SG vs. RYGB | 0.689           | 0.587        | 0.809        | 0.702           | 0.61         | 0.807        | 0.813           | 0.665        | 0.995        | <0.001          |
| AGB vs RYGB | 3.039           | 2.494        | 3.705        | 4.668           | 3.979        | 5.475        | 4.338           | 3.447        | 5.459        | <0.001          |
| AGB vs SG   | 4.411           | 3.512        | 5.54         | 6.65            | 5.519        | 8.013        | 5.333           | 4.059        | 7.007        | <0.001          |

Estimated percent of patients with event at 1, 3, and 5 years

|      |                 | 1 year   |              |              | 3 years  |              |              | 5 years  |              |              |
|------|-----------------|----------|--------------|--------------|----------|--------------|--------------|----------|--------------|--------------|
|      |                 | Estimate | Lower 95% CI | Upper 95% CI | Estimate | Lower 95% CI | Upper 95% CI | Estimate | Lower 95% CI | Upper 95% CI |
| RYGB | Comorbidity < 0 | 3.81     | 3.4          | 4.23         | 8.33     | 7.47         | 9.18         | 11.68    | 10.47        | 12.87        |
|      | Comorbidity = 0 | 4.07     | 3.72         | 4.42         | 8.88     | 8.17         | 9.58         | 12.43    | 11.43        | 13.42        |
|      | Comorbidity > 0 | 4.27     | 3.73         | 4.8          | 9.3      | 8.18         | 10.4         | 13.01    | 11.46        | 14.53        |
| SG   | Comorbidity < 0 | 2.64     | 2.26         | 3.02         | 5.82     | 5            | 6.62         | 8.2      | 7.05         | 9.33         |
|      | Comorbidity = 0 | 2.87     | 2.54         | 3.21         | 6.32     | 5.61         | 7.02         | 8.9      | 7.9          | 9.88         |
|      | Comorbidity > 0 | 3.49     | 2.87         | 4.1          | 7.63     | 6.32         | 8.93         | 10.72    | 8.89         | 12.51        |
| AGB  | Comorbidity < 0 | 11.14    | 9.07         | 13.17        | 23.23    | 19.19        | 27.06        | 31.44    | 26.19        | 36.32        |
|      | Comorbidity = 0 | 24.18    | 16.88        | 30.84        | 46.17    | 33.88        | 56.17        | 58.7     | 44.55        | 69.24        |
|      | Comorbidity > 0 | 12.42    | 9.62         | 15.13        | 25.67    | 20.29        | 30.69        | 34.53    | 27.62        | 40.78        |

**GERD:**

| Evidence of heterogeneous treatment effect of procedures on event time given GERD |             |              |              |             |              |              |                 |
|-----------------------------------------------------------------------------------|-------------|--------------|--------------|-------------|--------------|--------------|-----------------|
|                                                                                   | No GERD     |              |              | GERD        |              |              |                 |
|                                                                                   | Adjusted HR | Lower 95% CI | Upper 95% CI | Adjusted HR | Lower 95% CI | Upper 95% CI | p-value for HTE |
| SG vs. RYGB                                                                       | 0.716       | 0.633        | 0.811        | 0.724       | 0.622        | 0.843        | 0.91            |
| AGB vs RYGB                                                                       | 4.383       | 3.798        | 5.059        | 3.486       | 2.93         | 4.148        | 0.04            |
| AGB vs SG                                                                         | 6.12        | 5.179        | 7.232        | 4.816       | 3.901        | 5.945        | 0.06            |

| Estimated percent of patients with event at 1, 3, and 5 years |         |          |              |              |          |              |              |          |              |              |
|---------------------------------------------------------------|---------|----------|--------------|--------------|----------|--------------|--------------|----------|--------------|--------------|
|                                                               |         | 1 year   |              |              | 3 years  |              |              | 5 years  |              |              |
|                                                               |         | Estimate | Lower 95% CI | Upper 95% CI | Estimate | Lower 95% CI | Upper 95% CI | Estimate | Lower 95% CI | Upper 95% CI |
| RYGB                                                          | No GERD | 3.84     | 3.53         | 4.15         | 8.38     | 7.76         | 9            | 11.75    | 10.86        | 12.63        |
|                                                               | GERD    | 4.3      | 3.94         | 4.66         | 9.36     | 8.63         | 10.08        | 13.09    | 12.06        | 14.11        |
| SG                                                            | No GERD | 2.77     | 2.49         | 3.04         | 6.08     | 5.5          | 6.65         | 8.56     | 7.74         | 9.38         |
|                                                               | GERD    | 3.13     | 2.71         | 3.55         | 6.87     | 5.98         | 7.74         | 9.66     | 8.42         | 10.88        |
| AGB                                                           | No GERD | 15.78    | 13.75        | 17.76        | 31.87    | 28.19        | 35.35        | 42.18    | 37.6         | 46.43        |
|                                                               | GERD    | 14.21    | 11.94        | 16.42        | 29       | 24.78        | 32.99        | 38.68    | 33.35        | 43.58        |

| <b>Race/Ethnicity:</b>                                                                         |                    |              |              |                    |              |              |          |              |              |                    |              |              |                 |
|------------------------------------------------------------------------------------------------|--------------------|--------------|--------------|--------------------|--------------|--------------|----------|--------------|--------------|--------------------|--------------|--------------|-----------------|
| Evidence of heterogeneous treatment effect of procedures on event time given comorbidity score |                    |              |              |                    |              |              |          |              |              |                    |              |              |                 |
|                                                                                                | White non-Hispanic |              |              | Black non-Hispanic |              |              | Hispanic |              |              | Other non-Hispanic |              |              |                 |
|                                                                                                | Adj HR             | Lower 95% CI | Upper 95% CI | Adj HR             | Lower 95% CI | Upper 95% CI | Adj HR   | Lower 95% CI | Upper 95% CI | Adj HR             | Lower 95% CI | Upper 95% CI | p-value for HTE |
| SG vs. RYGB                                                                                    | 0.687              | 0.599        | 0.786        | 0.694              | 0.564        | 0.854        | 0.628    | 0.523        | 0.755        | 0.682              | 0.367        | 1.266        | <0.001          |
| AGB vs RYGB                                                                                    | 1.635              | 1.383        | 1.933        | 2.532              | 1.928        | 3.326        | 3.173    | 2.297        | 4.382        | 0.657              | 0.09         | 4.818        | <0.001          |
| AGB vs SG                                                                                      | 2.382              | 1.949        | 2.91         | 3.649              | 2.729        | 4.878        | 5.05     | 3.607        | 7.069        | 0.963              | 0.127        | 7.312        | <0.001          |

|      |                    | 1 year   |              |              | 3 years  |              |              | 5 years  |              |              |
|------|--------------------|----------|--------------|--------------|----------|--------------|--------------|----------|--------------|--------------|
|      |                    | Estimate | Lower 95% CI | Upper 95% CI | Estimate | Lower 95% CI | Upper 95% CI | Estimate | Lower 95% CI | Upper 95% CI |
| RYGB | White non-Hispanic | 3.95     | 3.61         | 4.28         | 8.6      | 7.92         | 9.26         | 12.05    | 11.1         | 13           |
|      | Black non-Hispanic | 4.45     | 3.82         | 5.08         | 9.65     | 8.34         | 10.94        | 13.5     | 11.69        | 15.28        |
|      | Hispanic           | 4.05     | 3.54         | 4.56         | 8.81     | 7.75         | 9.87         | 12.35    | 10.87        | 13.81        |
|      | Other non-Hispanic | 4.07     | 2.66         | 5.46         | 8.85     | 5.84         | 11.76        | 12.4     | 8.24         | 16.38        |
| SG   | White non-Hispanic | 3.05     | 2.69         | 3.4          | 6.67     | 5.93         | 7.41         | 9.4      | 8.35         | 10.43        |
|      | Black non-Hispanic | 2.96     | 2.48         | 3.44         | 6.48     | 5.46         | 7.48         | 9.13     | 7.71         | 10.53        |
|      | Hispanic           | 2.68     | 2.28         | 3.08         | 5.89     | 5.04         | 6.73         | 8.3      | 7.11         | 9.49         |
|      | Other non-Hispanic | 2.65     | 1.31         | 3.97         | 5.81     | 2.9          | 8.63         | 8.2      | 4.12         | 12.11        |
| AGB  | White non-Hispanic | 15.41    | 13.42        | 17.37        | 31.16    | 27.52        | 34.61        | 41.35    | 36.8         | 45.57        |
|      | Black non-Hispanic | 16.32    | 10.17        | 22.04        | 32.79    | 21.3         | 42.6         | 43.32    | 28.96        | 54.79        |
|      | Hispanic           | 15.79    | 13           | 18.49        | 31.84    | 26.73        | 36.6         | 42.18    | 35.82        | 47.9         |
|      | Other non-Hispanic | 2.65     | 0            | 7.66         | 5.82     | 0            | 16.28        | 8.21     | 0            | 22.42        |



**eAppendix Table 4. Kaplan-Meier Estimated Cumulative Incidence of Operations, Interventions and Endoscopy <sup>a</sup>**

|                                    | RYGB (n=18,056)      |                   |                      | SG (n=15,504)     |                   |                   | AGB (n=1,154)        |                      |                      |
|------------------------------------|----------------------|-------------------|----------------------|-------------------|-------------------|-------------------|----------------------|----------------------|----------------------|
|                                    | 1 year %<br>(95% CI) | 3 year %          | 5 year %             | 1 year %          | 3 year %          | 5 year %          | 1 year %             | 3 year %             | 5 year %             |
| <b>OPERATIONS <sup>b</sup></b>     | 4.5<br>(4.2, 4.8)    | 10<br>(9.5, 10.5) | 13.6<br>(12.9, 14.3) | 2.3<br>(2, 2.5)   | 5.2<br>(4.8, 5.6) | 8.3<br>(7.5, 9.2) | 20.5<br>(18.1, 22.8) | 33.5<br>(30.6, 36.3) | 43.4<br>(39.9, 46.6) |
| REVISION <sup>c</sup>              | 1.3<br>(1.2, 1.5)    | 2<br>(1.8, 2.2)   | 2.8<br>(2.5, 3.2)    | 1<br>(0.8, 1.1)   | 2.1<br>(1.8, 2.3) | 4<br>(3.3, 4.7)   | 6.2<br>(4.8, 7.6)    | 17.7<br>(15.3, 20)   | 28.6<br>(25.4, 31.8) |
| ABDOMINAL WALL HERNIA <sup>d</sup> | 1.4<br>(1.2, 1.6)    | 5.1<br>(4.7, 5.4) | 7<br>(6.5, 7.5)      | 0.7<br>(0.6, 0.9) | 2.1<br>(1.8, 2.4) | 3.2<br>(2.7, 3.7) | 0.3<br>(0, 0.6)      | 1.2<br>(0.5, 1.8)    | 2.1<br>(1.1, 3.1)    |
| OTHER OPERATIONS <sup>e</sup>      | 2.8<br>(2.6, 3.1)    | 5.5<br>(5.1, 5.9) | 7.9<br>(7.4, 8.5)    | 0.9<br>(0.8, 1.1) | 2.1<br>(1.8, 2.3) | 3.1<br>(2.6, 3.7) | 16.2<br>(14, 18.3)   | 19.4<br>(17, 21.7)   | 22.8<br>(20.1, 25.5) |
| <b>INTERVENTIONS <sup>f</sup></b>  |                      |                   |                      |                   |                   |                   |                      |                      |                      |
| ENTERAL ACCESS <sup>g</sup>        | 0.6<br>(0.5, 0.7)    | 1.1<br>(0.9, 1.2) | 1.3<br>(1.1, 1.5)    | 0.1<br>(0, 0.1)   | 0.2<br>(0.1, 0.2) | 0.3<br>(0.1, 0.4) | 0.3<br>(0, 0.6)      | 0.4<br>(0, 0.7)      | 0.9<br>(0.2, 1.7)    |
| OTHER INTERVENTIONS <sup>h</sup>   | 0.2<br>(0.1, 0.2)    | 0.3<br>(0.2, 0.4) | 0.4<br>(0.3, 0.6)    | 0.2<br>(0.1, 0.3) | 0.4<br>(0.3, 0.5) | 0.5<br>(0.3, 0.7) | 0.1<br>(0, 0.3)      | 0.1<br>(0, 0.3)      | 0.6<br>(0, 1.2)      |

|                               |                    |                      |                      |                 |                   |                 |                   |                     |                      |
|-------------------------------|--------------------|----------------------|----------------------|-----------------|-------------------|-----------------|-------------------|---------------------|----------------------|
| <b>ENDOSCOPY</b> <sup>i</sup> | 9.7<br>(9.3, 10.2) | 15.7<br>(15.1, 16.3) | 20.6<br>(19.8, 21.3) | 2.7<br>(2.4, 3) | 4.8<br>(4.4, 5.2) | 6.8<br>(6, 7.5) | 2.9<br>(1.9, 3.8) | 10.5<br>(8.6, 12.3) | 16.9<br>(14.3, 19.5) |
|-------------------------------|--------------------|----------------------|----------------------|-----------------|-------------------|-----------------|-------------------|---------------------|----------------------|

a – From Kaplan Meier plots

b - Category includes any operative procedure on the abdomen (includes subcategories of revision, abdominal wall hernia repairs, , and other reoperation-includes internal hernia, paraesophageal/hiatal hernia); **Biliary procedures including cholecystectomy were excluded;**

c - Category includes only subsequent bariatric procedures (e.g. conversion from SG to RYGB) as well as revisional procedures such as gastrectomy;

d- Category includes only repair of ventral hernias and other abdominal wall hernias - does not include internal hernias or paraesophageal/hiatal hernias;

e - Category includes those abdominal operative procedures not captured under the prior categories and represents presumed complications, includes internal hernias or paraesophageal/hiatal hernias;

f – Category includes any enteral access, non-operative procedures on the abdomen;

g – Category includes placement of gastrostomy tubes or other feeding devices, either percutaneously or through other means of access;

h– Category includes invasive but not operative procedures on the abdomen such as paracentesis, or radiologically-guided drainage procedures that do not involve incision

i – Category includes any endoscopic procedure for diagnosis or treatment on the upper GI tract





**eAppendix Table 5. Causes of Death\***

| All (n=34,714; 491 deaths) |                          |              | AGB (n=1,154; 27 deaths) |                           |              | RYGB (n=18,056; 364 deaths) |                         |              | SG (n=15,504; 100 deaths) |                          |              |
|----------------------------|--------------------------|--------------|--------------------------|---------------------------|--------------|-----------------------------|-------------------------|--------------|---------------------------|--------------------------|--------------|
| Rank                       | Cause of Death           | Total Number | Rank                     | Cause of Death            | Total Number | Rank                        | Cause of Death          | Total Number | Rank                      | Cause of Death           | Total Number |
| 1                          | None                     | 147          | 1                        | Cardiac                   | 9            | 1                           | None                    | 106          | 1                         | None                     | 38           |
| 2                          | Cardiac                  | 72           | 2                        | Endocrine                 | 7            | 2                           | Malignancy              | 51           | 2                         | Cardiac                  | 21           |
| 3                          | Malignancy               | 69           | 3                        | Diabetes                  | 7            | 3                           | Cardiac                 | 42           | 3                         | Endocrine                | 20           |
| 4                          | Endocrine                | 60           | 4                        | Coronary artery disease   | 5            | 4                           | Coronary artery disease | 38           | 4                         | Malignancy               | 15           |
| 5                          | Coronary artery disease  | 54           | 5                        | Stroke/intracranial bleed | 4            | 5                           | Diabetes                | 34           | 5                         | Respiratory              | 13           |
| 6                          | Diabetes                 | 49           | 6                        | Sleep apnea               | 4            | 6                           | Endocrine               | 33           | 6                         | Coronary artery disease  | 11           |
| 7                          | Sepsis                   | 36           | 7                        | Respiratory               | 4            | 7                           | Sepsis                  | 27           | 7                         | Alcohol/substance        | 9            |
| 8                          | Alcohol/Substance        | 34           | 8                        | Sepsis                    | 3            | 8                           | Accidental injury       | 23           | 8                         | Renal                    | 9            |
| 9                          | Hypertension             | 34           | 9                        | Alcohol/substance         | 3            | 9                           | Hypertension            | 23           | 9                         | Diabetes                 | 8            |
| 10                         | Respiratory              | 33           | 10                       | Malignancy                | 3            | 10                          | Alcohol/substance       | 22           | 10                        | GI                       | 8            |
| 11                         | Renal                    | 33           | 11                       | GI                        | 3            | 11                          | Trauma                  | 21           | 11                        | Hypertension             | 8            |
| 12                         | Accidental injury        | 29           | 12                       | Trauma                    | 3            | 12                          | Renal                   | 21           | 12                        | Congestive heart failure | 7            |
| 13                         | GI                       | 27           | 13                       | Hypertension              | 3            | 13                          | GI                      | 16           | 13                        | Sepsis                   | 6            |
| 14                         | Trauma                   | 27           | 14                       | Renal                     | 3            | 14                          | Respiratory             | 16           | 14                        | Accidental injury        | 6            |
| 15                         | Congestive heart failure | 22           | 15                       | None                      | 3            | 15                          | Self harm               | 15           | 15                        | Pulmonary embolism       | 5            |

|    |                              |    |  |    |                             |   |  |    |                             |    |  |    |               |   |
|----|------------------------------|----|--|----|-----------------------------|---|--|----|-----------------------------|----|--|----|---------------|---|
| 16 | Self harm                    | 18 |  | 16 | Medical<br>Complication     | 2 |  | 16 | Liver                       | 15 |  | 16 | Other         | 4 |
| 17 | Liver                        | 17 |  | 17 | Neurologic                  | 2 |  | 17 | Congestive heart<br>failure | 14 |  | 17 | Self harm     | 3 |
| 18 | Neurologic                   | 17 |  | 18 | Indeterminate               | 1 |  | 18 | Neurologic                  | 12 |  | 18 | Trauma        | 3 |
| 19 | Other                        | 13 |  | 19 | Other                       | 1 |  | 19 | Other                       | 8  |  | 19 | Flu/pneumonia | 3 |
| 20 | Stroke/Intracranial<br>bleed | 12 |  | 20 | Congestive heart<br>failure | 1 |  | 20 | Vascular                    | 8  |  | 20 | Vascular      | 3 |

\* Note that about one third (n=163) of the cohort have more than one cause of death contributing to the list of causes

eAppendix Figure 2. Kaplan-Meier Plot for Operation or Intervention (Oorl)

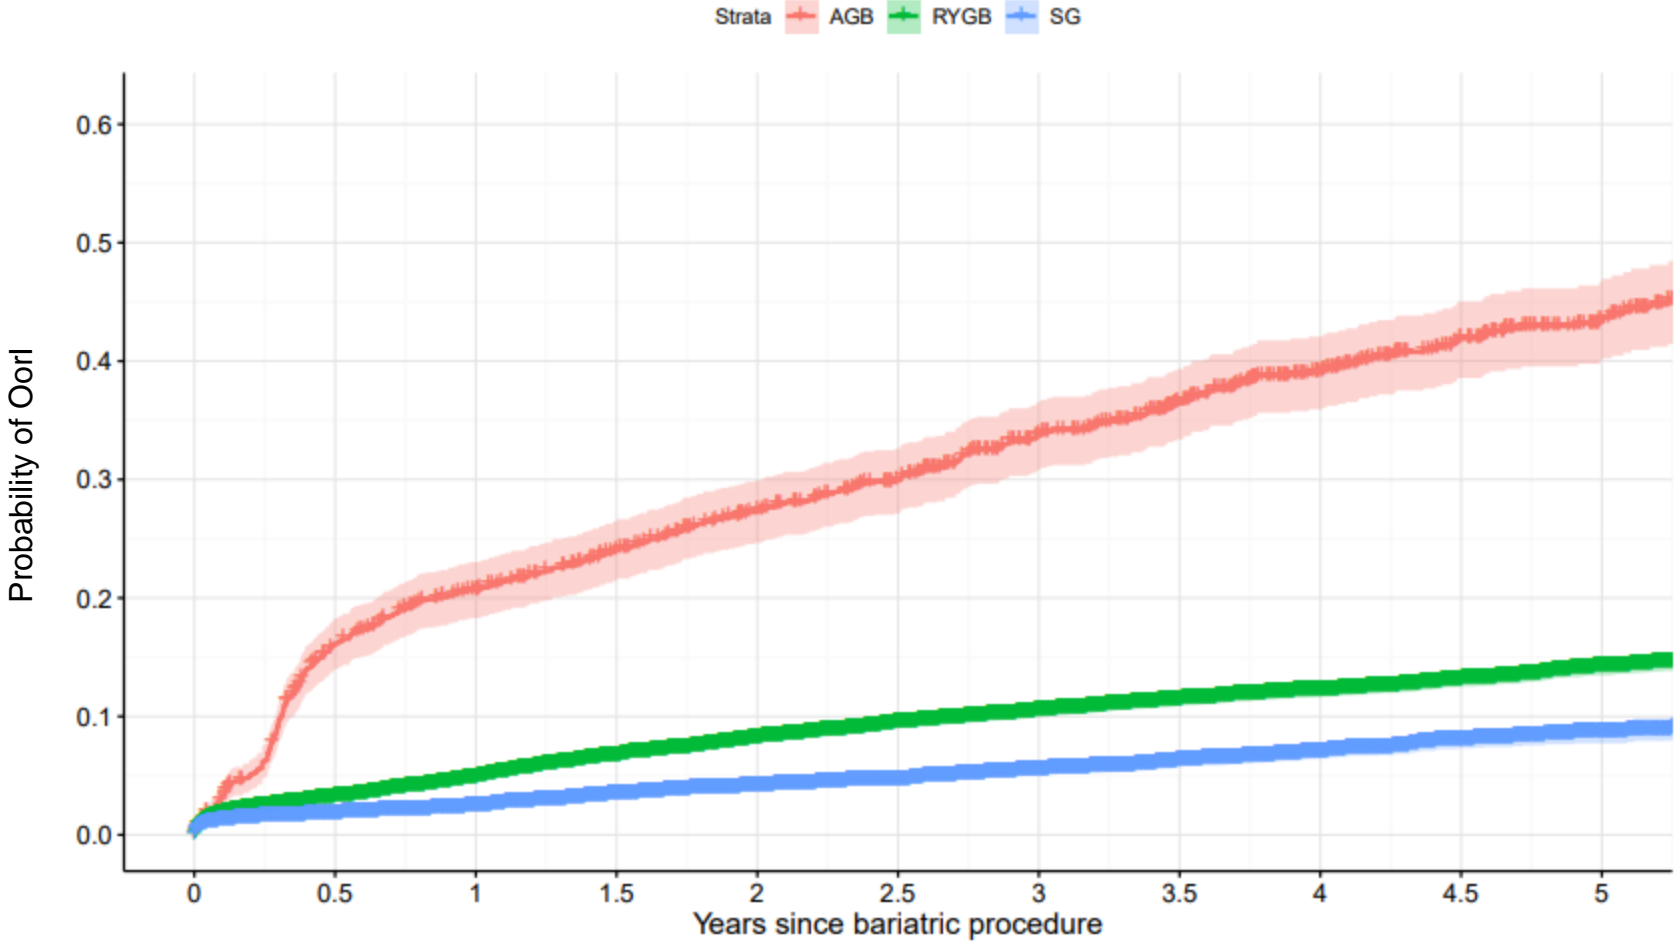

**Number at risk**

|      |       |       |       |       |       |       |      |      |      |      |      |
|------|-------|-------|-------|-------|-------|-------|------|------|------|------|------|
| AGB  | 1154  | 939   | 860   | 789   | 720   | 658   | 563  | 481  | 382  | 301  | 220  |
| RYGB | 18056 | 15945 | 14379 | 12872 | 11637 | 10305 | 9047 | 7613 | 6261 | 4779 | 3541 |
| SG   | 15504 | 12864 | 11103 | 9349  | 8095  | 6590  | 5264 | 3802 | 2517 | 1333 | 691  |
